# Supplementary material for: Unique 1D/3D K2Ti6O13/TiO2 micro-nano heteroarchitectures: controlled hydrothermal crystal growth and enhanced photocatalytic performance for water purification
Source: Royal Society of Chemistry journal article supplement (doi:10.1039/c9cy01833f), 2019-01-01
Supplement: c9cy01833f1.pdf [file c9cy01833f1.pdf]

## Electronic Supplementary Information

### **Unique 1D/3D K<sub>2</sub>Ti<sub>6</sub>O<sub>13</sub>/TiO<sub>2</sub> micro-nano heteroarchitectures: controlled hydrothermal crystal growth and enhanced photocatalytic performance for water purification**

Qiang Wang,<sup>a,b</sup> Chenming Fan,<sup>a</sup> Guomin Li,<sup>a</sup> Jiangshui Luo<sup>c,d\*</sup> and Bing Li<sup>a,c\*</sup>

<sup>a</sup>School of Mechanical and Power Engineering, East China University of Science and Technology,  
130 Meilong Road, Shanghai 200237, China.

<sup>b</sup>State Key Lab of High Performance Ceramics and Superfine Microstructure, Shanghai Institute of  
Ceramics, Chinese Academy of Sciences, 1295 Dingxi Road, Shanghai, 200050, China

<sup>c</sup>Collaborative Innovation Center of Clean Energy, Longyan University, Longyan 364012, China.

<sup>d</sup>Department of Physics and Astronomy, KU Leuven, Leuven 3001, Belgium

\*Corresponding Authors:

E-mail address: [jiangshui.luo@kuleuven.be](mailto:jiangshui.luo@kuleuven.be) (Jiangshui Luo); [bingli@ecust.edu.cn](mailto:bingli@ecust.edu.cn) (Bing Li)

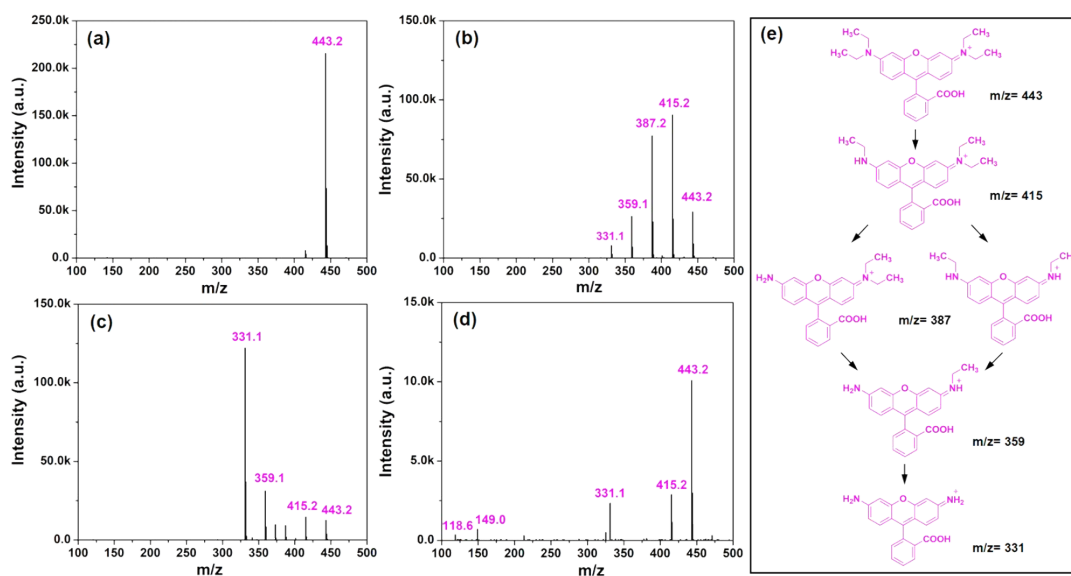

**Fig. S1** MS spectra of RhB solutions and the formed intermediates during degradation process at different irradiation time : (a) 0 min, (b) 30 min, (c) 60 min and (d) 90 min. (e) Proposed pathway for photocatalytic degradation of RhB molecules.

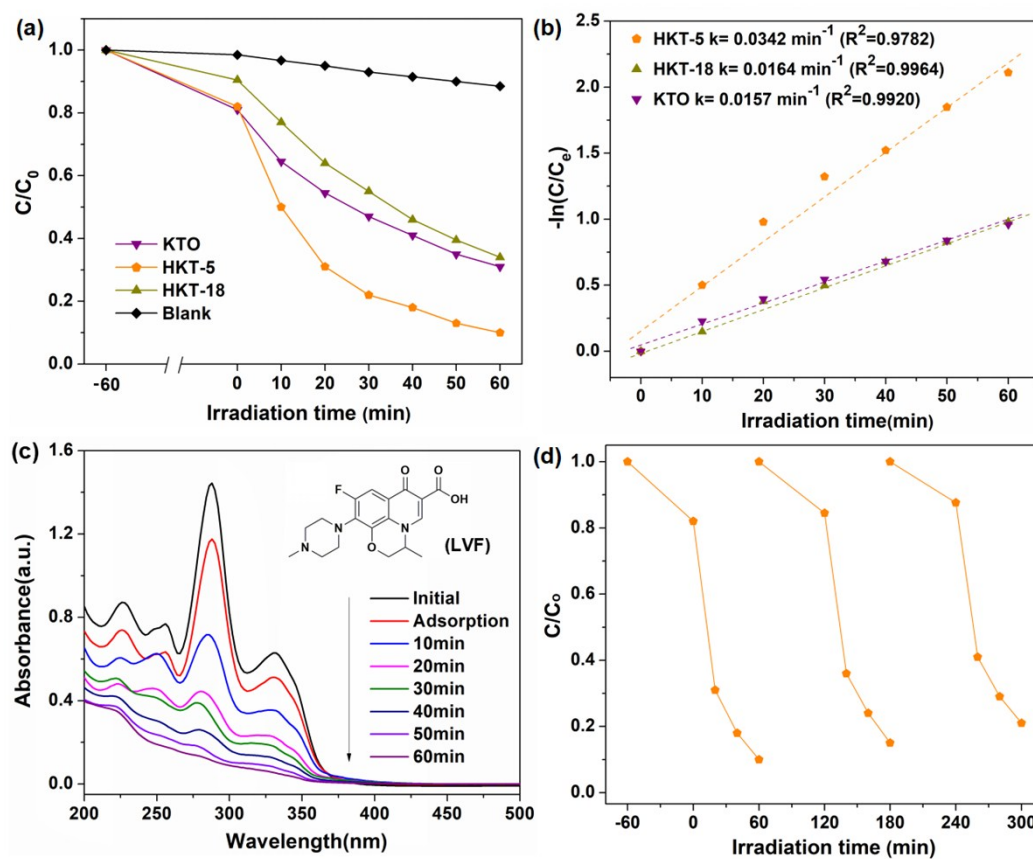

**Fig. S2** (a) Photocatalytic degradation of LVF under simulated sunlight irradiation. (b) Pseudo first-order kinetic analysis for LVF degradation. (c) UV-vis spectra of LVF solutions before and after photocatalytic tests in the presence of HKT-5. (d) Cycling tests for LVF degradation by HKT-5.
